# Supplementary material for: Synthesis of nitrogen-doped reduced graphene oxide directly from nitrogen-doped graphene oxide as a high-performance lithium ion battery anode
Source: Royal Society of Chemistry journal article supplement (doi:10.1039/c4ra05544f), 2014-01-01
Supplement: c4ra05544f1.pdf [file c4ra05544f1.pdf]

## Supplementary data

# Synthesis of Nitrogen-doped Reduced Graphene Oxide Directly from Nitrogen-doped Graphene Oxide as High- performance Lithium Ion Battery Anodes

*Meng Du, Jing Sun\*, Jie Chang, Fan Yang, Liangjing Shi and Lian Gao*

The State Key Lab of High Performance Ceramics and Superfine Microstructure,  
Shanghai Institute of Ceramics, Chinese Academy of Sciences, 1295 Dingxi Road,  
Shanghai 200050, P.R. China.

\* Corresponding author.

E-mail address: [jingsun@mail.sic.ac.cn](mailto:jingsun@mail.sic.ac.cn) (J. Sun)

Tel: +86 21 52414301. Fax: +86 21 5241312

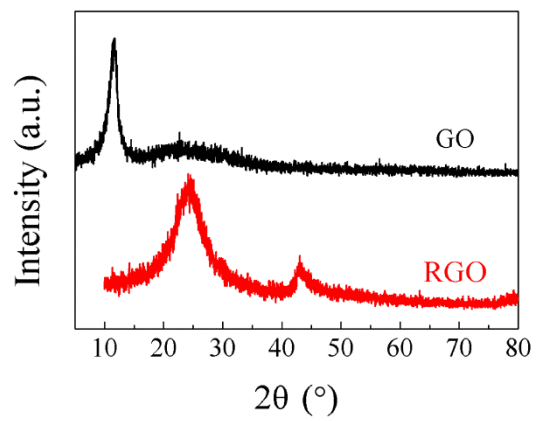

**Figure S1.** XRD patterns of GO and RGO.

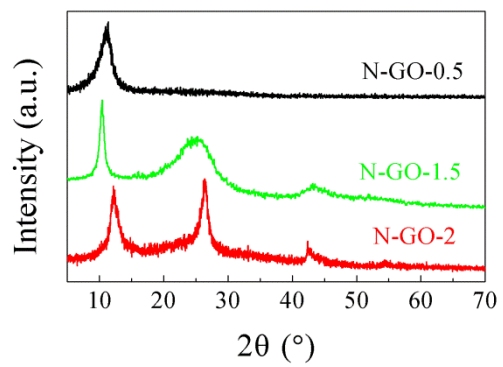

**Figure S2.** XRD patterns of N-GO-0.5, N-GO-1.5 and N-GO-2.

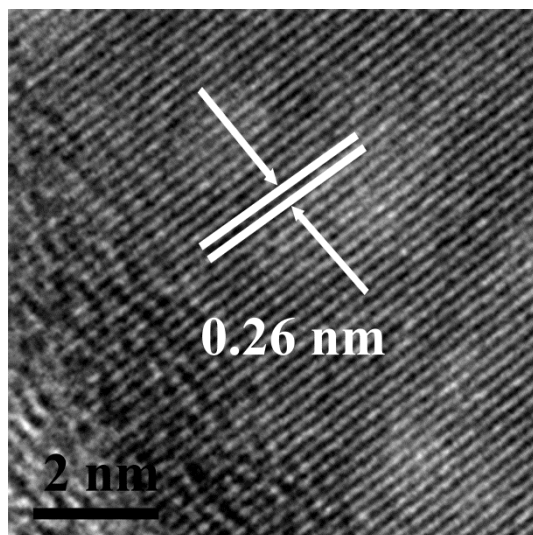

**Figure S3.** HRTEM image of  $\text{Fe}_2\text{O}_3$  particle in  $\text{Fe}_2\text{O}_3/\text{N-RGO}$  material.

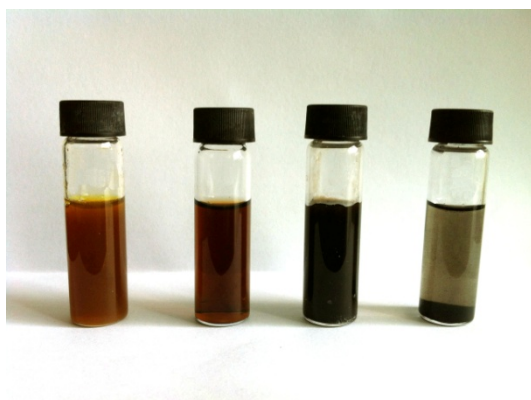

**Figure S4.** Digital photograph of N-GO-0.5 (left 1), N-GO (left 2), N-GO-1.5 (left 3) and N-GO-2 (left 4) after 12 h.

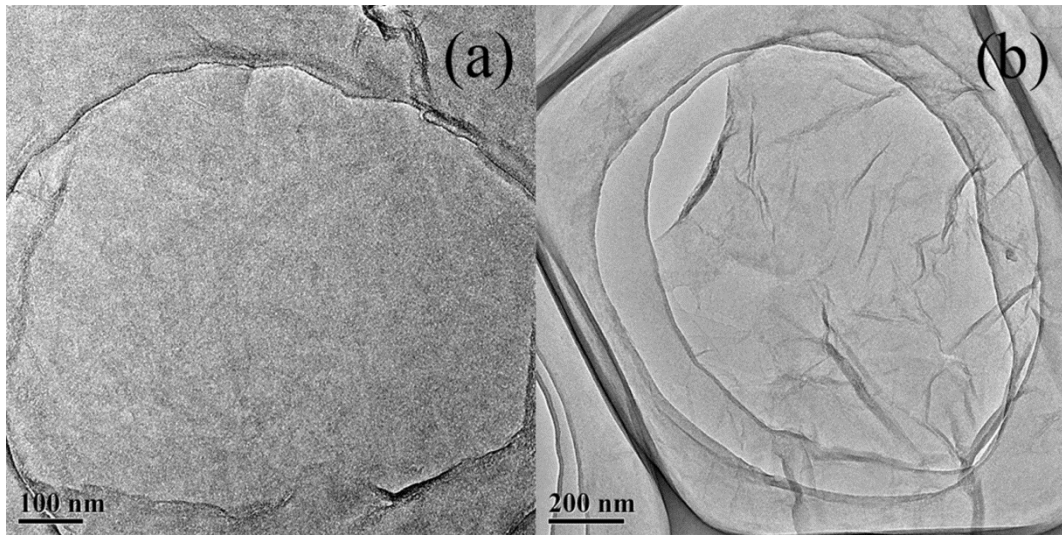

**Figure S5.** TEM images of GO at the measuring scale of (a) 100 nm and (b) 200 nm.

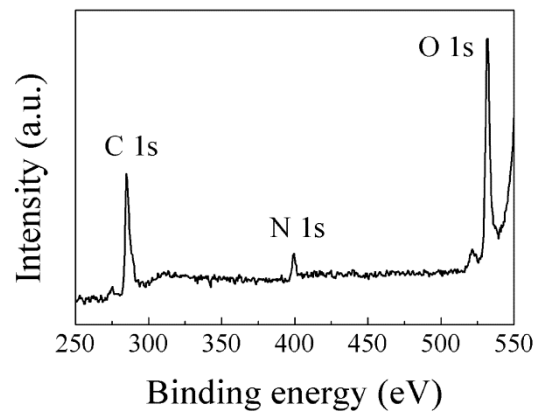

**Figure S6.** XPS spectrum of N-GO.

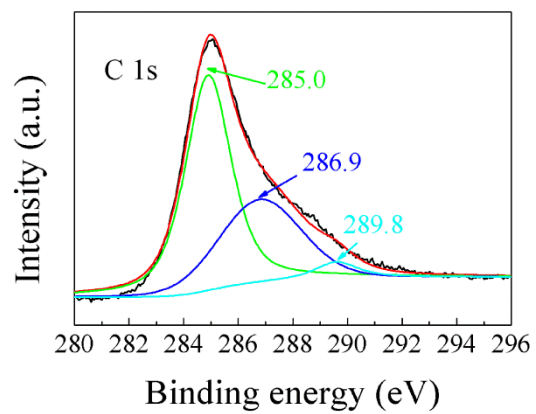

**Figure S7.** C 1s XPS spectrum of RGO.
